# Supplementary material for: Porphyrin–anthracene covalent organic frameworks for sustainable photosterilization
Source: Royal Society of Chemistry journal article supplement (doi:10.1039/d3tb02017g), 2023-01-01
Supplement: d3tb02017g1.pdf [file d3tb02017g1.pdf]

1 Supporting Information

2 **Porphyrin-anthracene Covalent Organic Framework for**  
3 **Sustainable Photosterilization**

4 Jing-Xuan Guo,<sup>e</sup> Xue-Mei Gao,<sup>cd</sup> Tian-Yue Gu,<sup>c</sup> Hao-Ze Li,<sup>c</sup> Li-Jian Chen,<sup>abc</sup> Xu Zhao,<sup>\*abc</sup>  
5 and Xiu-Ping Yan<sup>\*abcd</sup>

6 a. State Key Laboratory of Food Science and Resources, Jiangnan University, Wuxi  
7 214122, China.

8 b. International Joint Laboratory on Food Safety, Jiangnan University, Wuxi 214122,  
9 China.

10 c. Institute of Analytical Food Safety, School of Food Science and Technology, Jiangnan  
11 University, Wuxi 214122, China.

12 d. Key Laboratory of Synthetic and Biological Colloids, Ministry of Education, School of  
13 Chemical and Material Engineering, Jiangnan University, Wuxi, 214122, China.

14 e. Dongjiu campus, Jiangnan University Yixing Graduate School

15 \* Corresponding author

16 E-mail address: [zhaoxu2017@jiangnan.edu.cn](mailto:zhaoxu2017@jiangnan.edu.cn) (X. Zhao); [xpyan@jiangnan.edu.cn](mailto:xpyan@jiangnan.edu.cn) (X.-  
17 P. Yan)

18

19 **Supplementary Methods**

20 **Chemicals and materials.** 5,10,15,20-tetra-(4-aminophenyl) porphyrin (TAPP) and  
21 9,10-bis(4-formylphenyl) anthracene (DPA) were purchased from Jilin Chinese  
22 Academy of Sciences-Yanshen Technology Co., Ltd. (Jilin, China). Mesitylene, *n*-butanol  
23 (*n*-BuOH), acetonitrile (ACN), Ethanol (EtOH), acetic acid, *N,N*-dimethylformamide  
24 (DMF) and tetrahydrofuran (THF), were purchased from Sinopharm Chemical Reagent  
25 Co., Ltd. (Shanghai, China). Dioxane, *o*-dichlorobenzene (*o*-DCB) and 9,10-  
26 Anthracenediyl-bis (methylene) dimalonic acid (ABDA) were purchased from Macklin  
27 Biochemical Co., Ltd. (Shanghai, China). 1,3-Diphenylisobenzofuran (DPBF) and 2,7-  
28 dichlorodihydrofluorescein diacetate (DCFH-DA) was purchased from Aladdin  
29 (Shanghai, China). Ultrapure water was purchased from Hangzhou Wahaha Group Co.,  
30 Ltd (Hangzhou, China). Luria-Bertani (LB) Broth Powder (FMB Grade), LB Agar Powder  
31 (FMB Grade) and phosphate buffer saline solution premixed powder were purchased  
32 from Shanghai Sangon Biotech (Shanghai, China). *Escherichia coli* (*E. coli*, ATCC 25922)  
33 and *Staphylococcus aureus* (*S. aureus*, ATCC 25923) were thawed from the frozen  
34 bacteria in our laboratory. Other reagents were at least of analytical grade and used  
35 without further purification.

36 **Instrumentation and Characterization.** Powder X-ray diffraction (PXRD) patterns were  
37 recorded on a D2 PHASER X-ray diffractometer (Bruker, German). Fourier transform  
38 infrared (FT-IR) spectra were carried out on a Nicolet IS50 spectrometer (Thermo,  
39 America) by using KBr pellet. The UV-vis absorption spectra were recorded on a UV-  
40 3600 PLUS (Shimadzu, Japan). Bacteria imaging experiments were obtained with a

41 FV3000 confocal laser scanning microscopy (CLSM) (Olympus, Japan). Scanning  
42 electron microscopy images (SEM) were carried out on a SU8100 SEM (Hitachi, Japan).

43 **Synthesis of Por-DPA.** A 35 mL Schlenk tube was charged with TAPP (67.5 mg, 0.10  
44 mmol), DPA (77.3 mg, 0.20 mmol), and a mesitylene/*n*-butanol solution (9/1, V/ V, 2  
45 mL), and the homogeneous suspension was obtained by sonicated for 10 min.  
46 Afterwards, aqueous acetic acid (6 mol L<sup>-1</sup>, 0.2 mL) was added and sonicated for 5 min.  
47 Then, the tube was degassed through three freeze-pump-thaw cycles and sealed with a  
48 screw cap, and the resultant mixture was kept at 120 °C for 3 d. The yielded product  
49 was collected by centrifugation, washed several times with THF and DMF. Then, the  
50 collected powder was dried under vacuum at 45 °C to obtain Por-DPA COF.

51 **Photothermal Properties of Por-DPA.** To evaluate the photothermal property of Por-  
52 DPA, 1 mL of Por-DPA in different concentrations (0 µg mL<sup>-1</sup>, 100 µg mL<sup>-1</sup>, 200 µg mL<sup>-1</sup>  
53 and 400 µg mL<sup>-1</sup>) was exposed under the white light (100 mW cm<sup>-2</sup>) for 30 min. The  
54 suspension of TAPP (200 µg mL<sup>-1</sup>) under the same condition was chosen as the control  
55 group. The temperature changes and thermal images of the solution in real time were  
56 all recorded by a FLIR-50 thermal imaging camera. Meanwhile, the same method was  
57 used to determine the temperature changes and thermograms of 200 µg mL<sup>-1</sup> of Por-  
58 DPA under different power densities of irradiation (50 mW cm<sup>-2</sup>, 100 mW cm<sup>-2</sup> and 150  
59 mW cm<sup>-2</sup>).

60 **Photodynamic Properties of Por-DPA.** To validate the photodynamic property of Por-  
61 DPA, ABDA as a ROS indicator was chosen to monitor the generation of <sup>1</sup>O<sub>2</sub>.<sup>[1]</sup> Briefly,  
62 0.1 mL of 5 × 10<sup>-3</sup> mol L<sup>-1</sup> ABDA in DMF was blended with 9.9 mL Por-DPA in ultrapure

63 water (the final concentration of Por-DPA was  $0 \mu\text{g mL}^{-1}$ ,  $100 \mu\text{g mL}^{-1}$ ,  $200 \mu\text{g mL}^{-1}$  and  
64  $400 \mu\text{g mL}^{-1}$ , respectively). Then, the above solutions were exposed to white light ( $100$   
65  $\text{mW}\cdot\text{cm}^{-2}$ ) irradiation, and  $1 \text{ mL}$  of the irradiated solution was taken out and  
66 centrifuged at different times ( $0 \text{ min}$ ,  $3 \text{ min}$ ,  $6 \text{ min}$ ,  $9 \text{ min}$ ,  $12 \text{ min}$ ,  $15 \text{ min}$ ,  $18 \text{ min}$ ,  $21$   
67  $\text{min}$ ,  $24 \text{ min}$  and  $30 \text{ min}$ , respectively). After that, the absorbance spectra of each  
68 solution were recorded on a UV-vis-NIR spectrophotometer. TAPP ( $100 \mu\text{g mL}^{-1}$ ) under  
69  $100 \text{ mW cm}^{-2}$  irradiation was used as a control group. Meanwhile, the photodynamic  
70 properties of Por-DPA under different power of irradiation ( $50 \text{ mW cm}^{-2}$ ,  $100 \text{ mW cm}^{-2}$   
71  $^2$  and  $150 \text{ mW cm}^{-2}$ , respectively) were also measured by the same method. ABDA  
72 under  $150 \text{ mW cm}^{-2}$  irradiation was used as a blank group. It is worth noting that all  
73 operations in these experiments should be performed in the dark.

74 The sustainable  $^1\text{O}_2$  generation of Por-DPA without irradiation was further  
75 investigated with DPBF as a probe.<sup>[2, 3]</sup> Briefly,  $600 \mu\text{L}$  of  $1 \times 10^{-4} \text{ mol L}^{-1}$  DPBF in ACN  
76 was blended with  $400 \mu\text{L}$  Por-DPA in  $\text{H}_2\text{O}$  (the final concentration of Por-DPA was  $200$   
77  $\mu\text{g mL}^{-1}$ ). Then, the above solutions were exposed to  $808 \text{ nm}$  laser ( $0.6 \text{ W}\cdot\text{cm}^{-2}$ )  
78 irradiation for  $3 \text{ minutes}$ , followed by stored in the absence of lightness. After being  
79 stored in the dark for different periods of time ( $0$ ,  $3$ ,  $6$ ,  $9$ ,  $12$  and  $24 \text{ min}$ , respectively),  
80  $1 \text{ mL}$  of the solution was taken out and centrifuged. Then, the absorbance spectra of  
81 each solution were recorded on a UV-vis-NIR spectrophotometer. All procedures after  
82 pre-excitation are carried out in the dark to avoid light interference.

83 **Bacterial Cultures and Sterilization Experiment.** The bactericidal properties of Por-  
84 DPA were evaluated using two typical bacteria, Gram-positive *S. aureus* and Gram-

85 negative *E. coli*, as model bacteria. In brief, the frozen primitive bacteria were  
86 resuscitated and cultured in 5 mL Luria Bertani broth medium under 12 h shaking (200  
87 rpm) at 37°C, and further experiments were carried out after culture to exponential  
88 growth stage.

89 100 µL of *E. coli* or *S. aureus* in PBS (colony concentration of  $10^7$  CFU mL<sup>-1</sup> in final  
90 mixed solution) were mixed respectively with 900 µL of Por-DPA solution in centrifuge  
91 tubes to a final concentrations of 200 and 400 µg mL<sup>-1</sup> and incubated at 37°C for 30  
92 min. Then, the above two model bacteria were divided into the following groups: (1)  
93 bacteria in PBS without irradiation (blank group), (2) bacteria in PBS under irradiation  
94 for 30 min, (3) the bacteria treated with Por-DPA in PBS, (4) the bacteria treated with  
95 pre-irradiated Por-DPA in PBS, (5) the incubated bacteria with Por-DPA in PBS under  
96 irradiation for 10 min, 20 min, 30 min, respectively. Irradiation was performed with  
97 white light (100 mW cm<sup>-2</sup>). 100 µL of above bacterial suspension was extracted from  
98 each group and gradually diluted  $10^4$  times. Then, 100 µL of each diluted bacteria  
99 solution was spread evenly onto Luria Bertani broth agar plates and cultured at 37°C  
100 for 24 h. Finally, the colonies number was counted.

101 **Detection of intracellular <sup>1</sup>O<sub>2</sub> in Bacteria.** To further identify the photodynamic  
102 sterilization mechanism of Por-DPA, DCFH-DA was used as the indicator.<sup>[4]</sup> Briefly, 1 mL  
103 of *E. coli* solutions ( $10^7$  CFU mL<sup>-1</sup>) was cultured with Por-DPA (200 µg mL<sup>-1</sup>) and DCFH-  
104 DA (10 µmol L<sup>-1</sup>) for 30 min. Afterward, irradiation with or without white light (100  
105 mW cm<sup>-2</sup>, 10 min, 20 min, 30 min, respectively) was performed. Then, the bacterial  
106 suspension was centrifuged (5000 rpm, 10 min) and resuspended in 20 µL PBS. Finally,

107 10  $\mu\text{L}$  of resuspended bacterial solution was dropped onto the glass slide and then  
108 corresponding CLSM images was acquired under excitation at 488 nm.

109 **Morphological Observation of Bacteria.** After incubation with PBS or Por-DPA  
110 dispersion (final concentrations of  $200 \mu\text{g mL}^{-1}$ ) at  $37^\circ\text{C}$  in the dark for 30 min, the *E.*  
111 *coli* suspension ( $10^7 \text{CFU mL}^{-1}$ ) was irradiated by the white LED light ( $100 \text{mW cm}^{-2}$ ) for  
112 0 min, 10 min, 20 min, 30 min or not, respectively. Then, the above bacterial solutions  
113 were centrifuged (4000 rpm, 10 min) and fixed in 2.5% glutaraldehyde for 16 h. The  
114 resulting bacteria were further washed twice with PBS, and dehydrated through  
115 treating with 30%, 50%, 70%, 80%, 95% and 100% (v/v) gradient ethanol for 10 min.  
116 Finally, the resulting samples were freeze-dried and the morphologies of *E. coli* were  
117 observed on SEM.

118 **Murine Infection Model.** The animal experiment has passed the examination and  
119 approval of the Ethics Committee of Jiangnan University (Wuxi, China)  
120 (JN.No20220430b0180606[147]). The sustainable photosterilization of the Por-DPA  
121 COF on the wound healing process was evaluated using a mouse full-thickness  
122 cutaneous wound model infected with *E. coli*. First, female BALB/c mice (5-6 weeks,  
123 purchased from the Changzhou Cavens Experimental Animal Co. Ltd.) were  
124 anesthetized, and then their backs were created a round skin wound ( $d \approx 7 \text{mm}$ ).  
125 Subsequently, the back wound of the mice was added with 20 $\mu\text{L}$  of *E. coli* solution  
126 dropwise to establish an infection mode. According to different treatments, they were  
127 divided into five groups randomly, and each group had five parallel samples for  
128 contrast. The five groups were given the following treatments: no treatment, Por-DPA

129 (Por-DPA-treated without irradiation, irradiation (only irradiated with 30-min white  
130 light, 100 mW cm<sup>-2</sup>), Por-DPA + pre-irradiation (treated with Por-DPA pre-irradiated  
131 for 30-min with white light, 100 mW cm<sup>-2</sup>), Por-DPA + irradiation (coated with Por-DPA  
132 followed by 30-min irradiation treatment, 100 mW cm<sup>-2</sup>). The dosage and  
133 concentration of Por-DPA in the above experimental groups were 50 μL and 400 μg  
134 mL<sup>-1</sup>, respectively. Then, the wound allowed to heal naturally for 12 days, and the  
135 changes of body weight and wound area during the healing process were recorded.

136 The mice were sacrificed on the 12th day for evaluate the performance in  
137 biomedical science of the Por-DPA, and the wound skin tissues were collected for  
138 Masson and hematoxylin and eosin (H&E) staining and immunohistochemistry  
139 analysis (including tumor necrosis factor-α (TNF-α) and interleukin-6 (IL-6)).

#### 140 **Supplementary References.**

- 141 1. X. Zhao, M.-Y. Yin, T.-Y. Gu, X.-M. Gao, L.-J. Chen, Z.-Y. Wang and X.-P. Yan, *ACS*  
142 *Appl. Nano Mater.*, 2023, **6**, 12402-12412.
- 143 2. J. Zou, J. Zhu, Z. Yang, L. Li, W. Fan, L. He, W. Tang, L. Deng, J. Mu, Y. Ma, Y. Cheng,  
144 W. Huang, X. Dong and X. Chen, *Angew. Chem., Int. Ed. Engl.*, 2020, **59**, 8833-8838.
- 145 3. D. Yan, E. Lin, F. Jin, S. Qiao, Y. Yang, Z. Wang, F. Xiong, Y. Chen, P. Cheng and Z.  
146 Zhang, *J. Mater. Chem. A*, 2021, **9**, 27434-27441.
- 147 4. J. H. Sun, E. T. Feng, Y. T. Shao, F. Y. Lv, Y. N. Wu, J. R. Tian, H. Sun and F. L. Song,  
148 *Chembiochem*, 2022, **23**, e202200421.

149

150

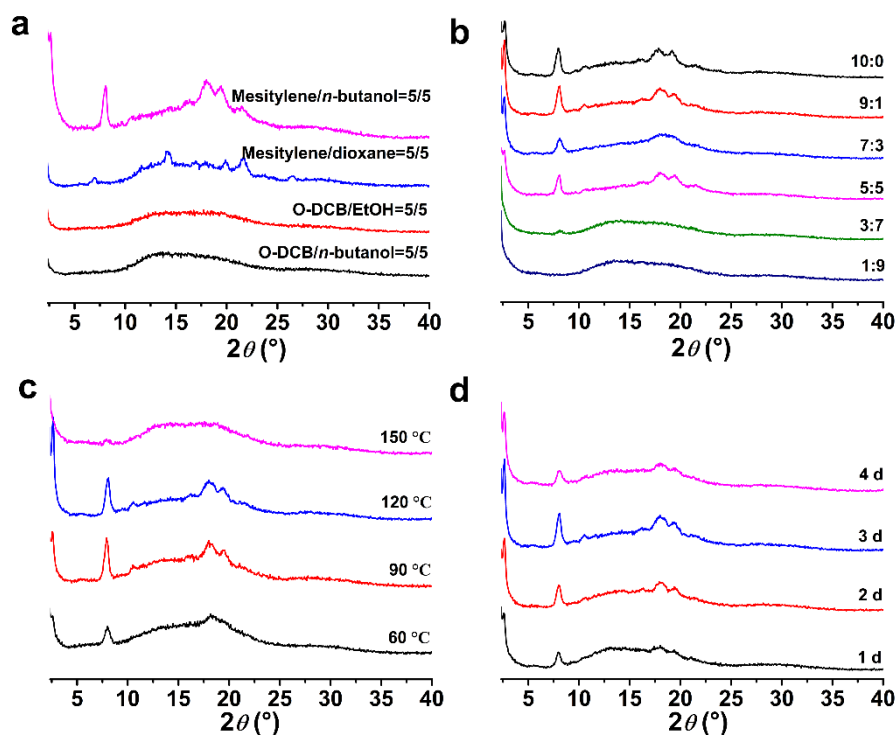

152

153 **Fig. S1.** (a) Effect of reaction solvent on the PXRD pattern of Por-DPA COF at 120 °C for

154 3 days. (b) Effect of the ratio of mesitylene to *n*-butanol (v/v) on the PXRD pattern of

155 Por-DPA COF under the reaction at 120 °C for 3 days. (c) Effect of reaction temperature

156 on the PXRD pattern of Por-DPA COF under 3 days of reaction with mesitylene and *n*-

157 butanol (1/1, V/V) as solvent. (d) Effect of reaction time on the PXRD pattern of Por-

158 DPA COF at 120 °C with mesitylene and *n*-butanol (1/1, V/V) as solvent.

159



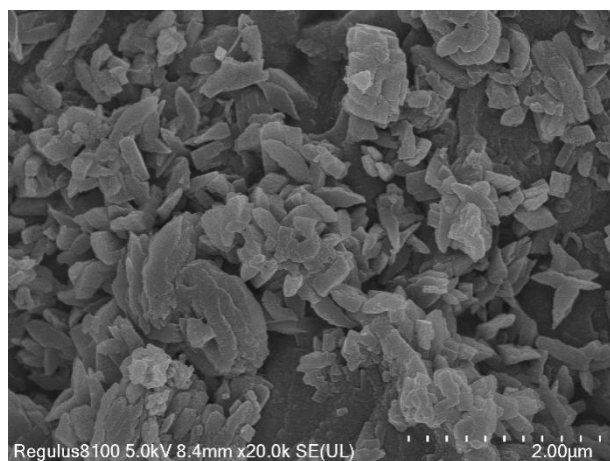

160

161 **Fig. S2.** SEM image of Por- DPA COF.

162

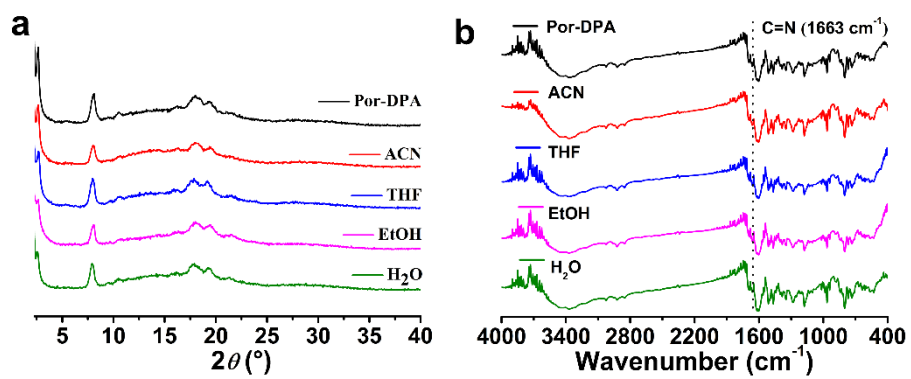

163

164 **Fig. S3.** PXRD patterns (a) and IR patterns (b) of Por-FPA COF after treatment with

165 various solvents at 25 °C.

166

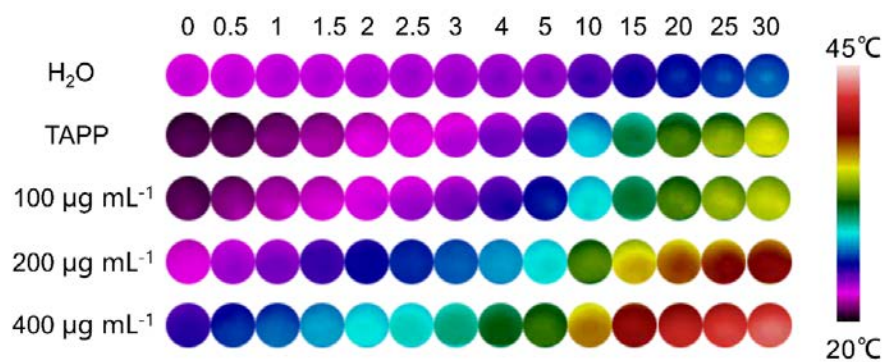

167

168 **Fig. S4.** The IR thermal images of different solutions including H<sub>2</sub>O, TAPP (200 μg mL<sup>-1</sup>)

169 and different concentrations of Por-DPA under irradiation (100 mW cm<sup>-2</sup>) (The unit of

170 time is min).

171

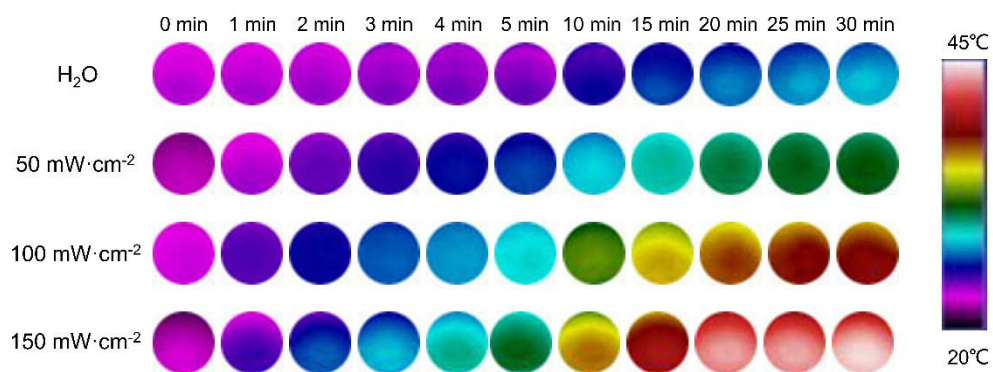

172

173 Fig. S5. The IR thermal images of different solutions including H<sub>2</sub>O under irradiation

174 (150 mW cm<sup>-2</sup>) and Por- DPA (200 μg mL<sup>-1</sup>) under different irradiations.

175

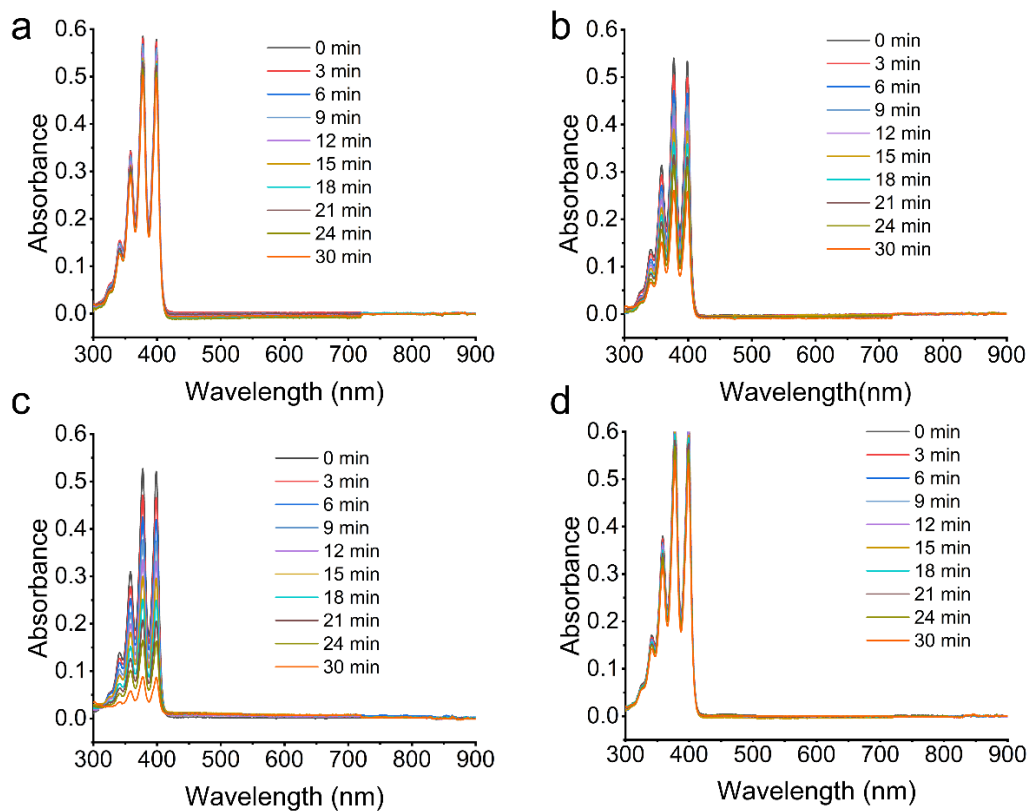

177

178 **Fig. S6.** Time-dependent absorption spectra changes of ABDA at 377 nm with different  
179 concentrations of Por-DPA (a, 0  $\mu\text{g mL}^{-1}$ ; b, 100  $\mu\text{g mL}^{-1}$ ; c, 200  $\mu\text{g mL}^{-1}$ ; d, TAPP 100  $\mu\text{g}$   
180  $\text{mL}^{-1}$ ) under irradiation (100  $\text{mW cm}^{-2}$ ).

181

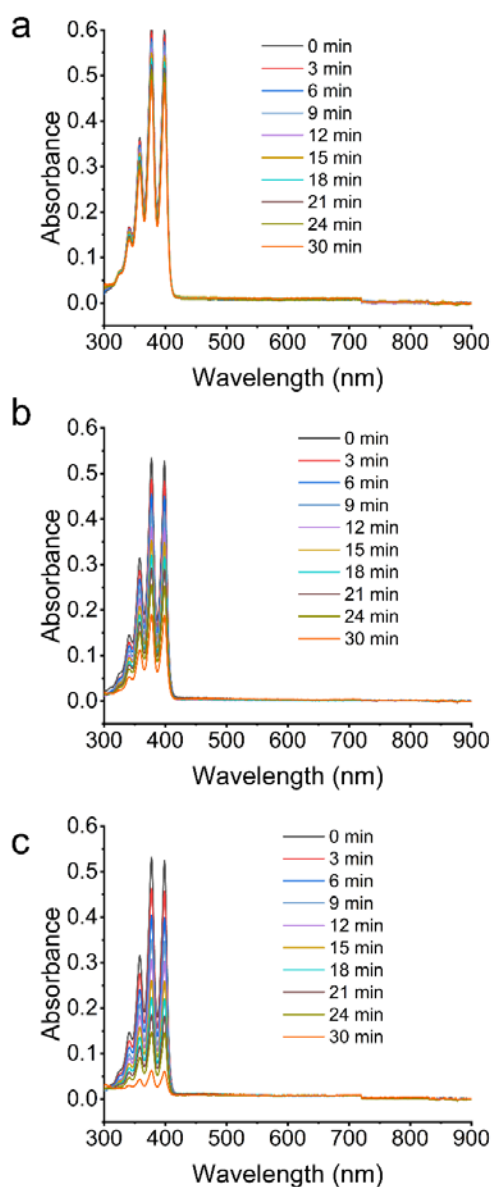

182

183 **Fig. S7.** (a) Time-dependent absorption spectra changes of ABDA at 377 nm under  
 184 irradiation ( $150 \text{ mW cm}^{-2}$ ). (b and c) Time-dependent absorption spectra changes of  
 185 ABDA at 377 nm with Por-DPA ( $200 \mu\text{g mL}^{-1}$ ) under different irradiations ( $50 \text{ mW cm}^{-2}$   
 186 and  $150 \text{ mW cm}^{-2}$ , respectively).

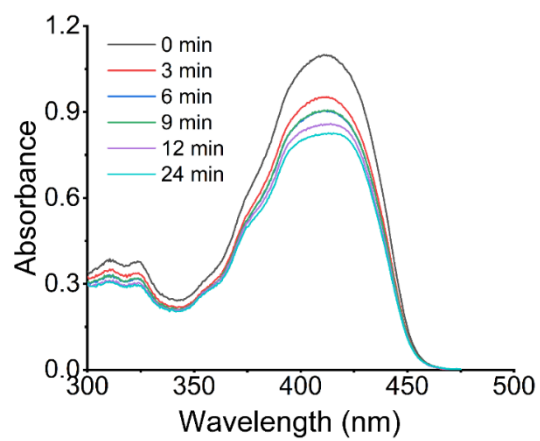

187

188 **Fig. S8.** Time-dependent absorption spectra change of DPBF ( $6 \times 10^{-5} \text{ mol L}^{-1}$ ) at 410

189 nm with per-irradiated Por-DPA ( $200 \mu\text{g mL}^{-1}$ ).

190

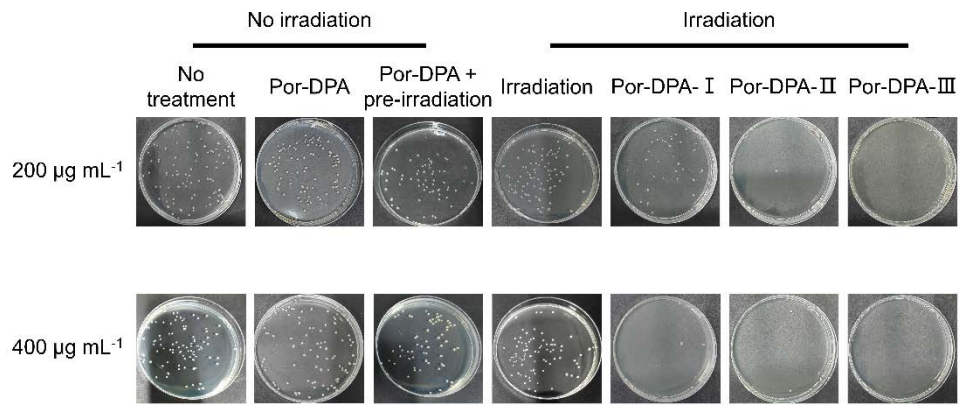

191

192 **Fig. S9.** Flat colony photographs of *E. coli* colonies after different treatments. Por-DPA-

193 I, Por-DPA-II and Por-DPA-III represented irradiation for 10, 20 and 30 min, respectively.

194



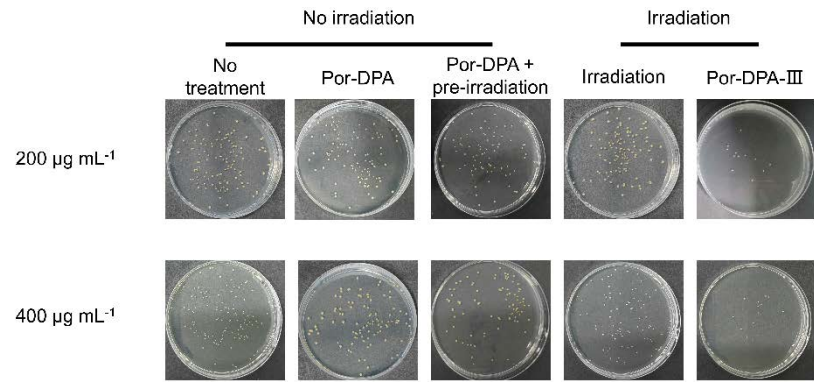

195

196 **Fig. S10.** Flat colony photographs of *S. aureus* colonies after different treatments. Por-

197 DPA-III represented irradiation for 30 min.

198

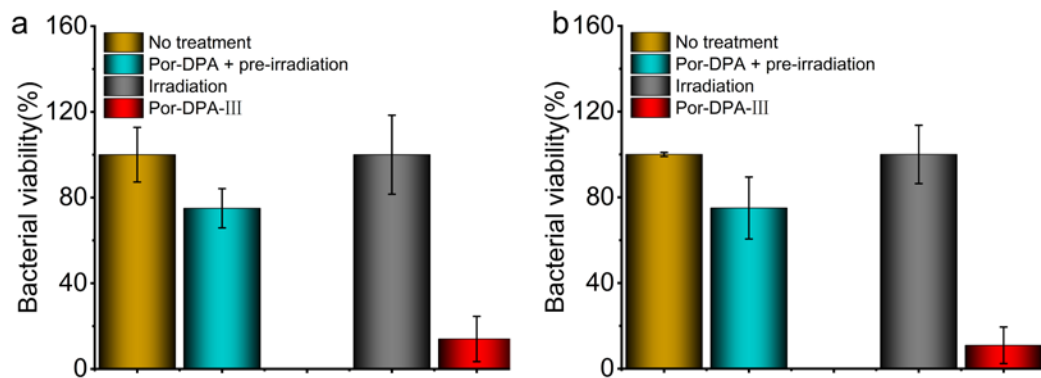

199

200 **Fig. S11.** In vitro bacterial viability of *S. aureus*. incubated with Por-DPA at (a) 200 µg

201 mL<sup>-1</sup> and (b) 400 µg mL<sup>-1</sup>, respectively, under different treatments.

202

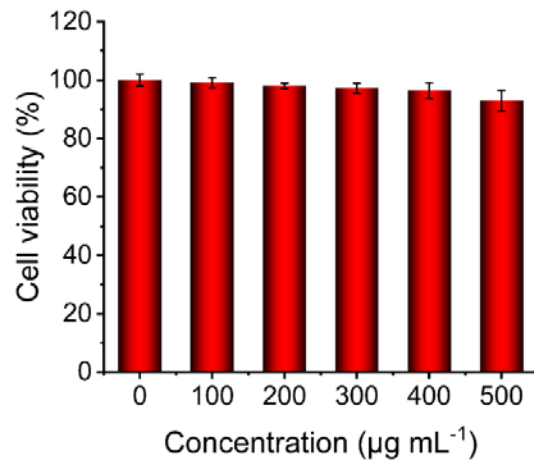

203

204 **Fig. S12.** Cell viability of 3T3 cells incubated with various concentrations of Por-DPA.

205 Data were presented as the mean  $\pm$  SD (n = 3).

206

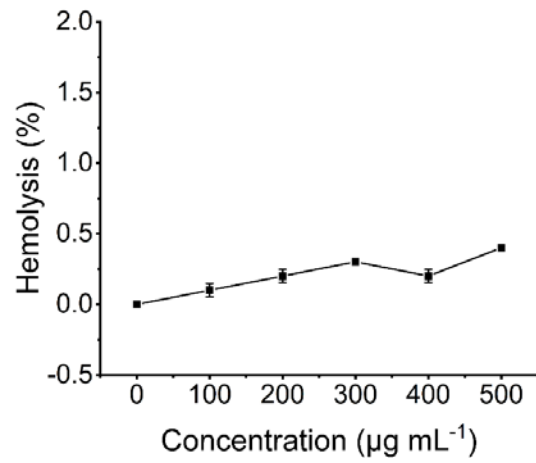

207

208 **Fig. S13.** Hemolysis rate of red blood cells incubated with different concentrations of

209 Por-DPA. Data were presented as the mean  $\pm$  SD ( $n = 3$ ).

210

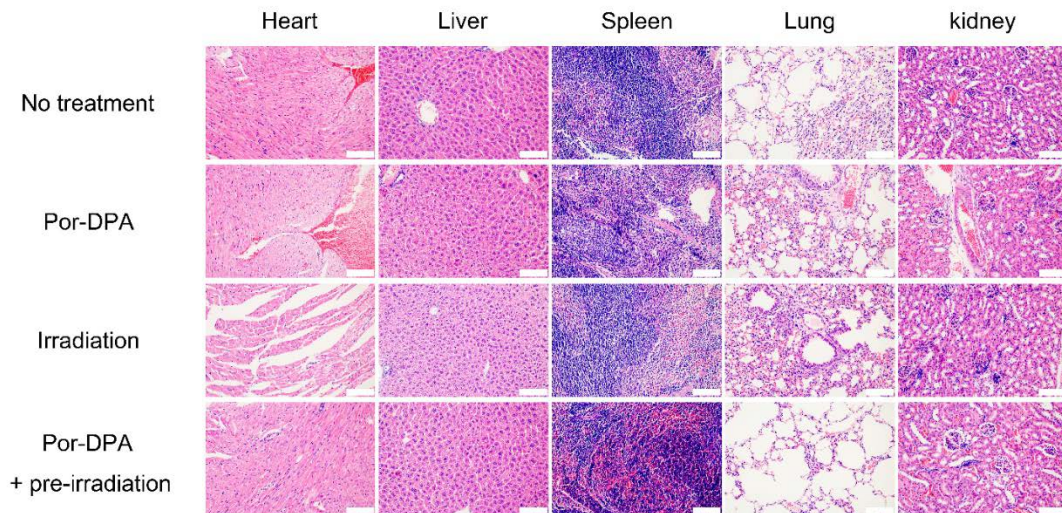

211

212 **Figure S14.** H&E staining of main organs of mice after various treatments for 12 days.

213 (Scale bar, 200  $\mu$ m).

214

215 **Supplementary Table**216 **Table S1** Fractional main atomic coordinates for the unit cell of TAPP-DPA COF after

217 Pawley refinement

---

**TAPP-DPA COF: Space group symmetry P4/m****a = b = 33.7047 Å, c = 10.5931 Å,  $\alpha = \beta = \gamma = 90^\circ$** 

---

| Atom | x       | y        | z       |
|------|---------|----------|---------|
| C1   | 1.22707 | -0.50147 | 0.34284 |
| C2   | 1.20778 | -0.4655  | 0.36838 |
| C3   | 1.16756 | -0.46501 | 0.40065 |
| C4   | 1.14562 | -0.50054 | 0.41424 |
| C5   | 1.16486 | -0.53601 | 0.37659 |
| C6   | 1.20495 | -0.53643 | 0.34313 |
| C7   | 1.10205 | -0.50055 | 0.45115 |
| C8   | 1.08288 | -0.53473 | 0.47605 |
| C9   | 1.09909 | -0.56859 | 0.54405 |
| C10  | 1.07075 | -0.5954  | 0.54622 |
| C11  | 1.03709 | -0.57995 | 0.47321 |
| N12  | 1.04304 | -0.54343 | 0.43917 |
| N13  | 1.26832 | -0.50336 | 0.30934 |
| C14  | 1.02253 | -0.79502 | 0.34171 |
| C15  | 1.01771 | -0.8368  | 0.30292 |
| C16  | 0.98896 | -0.84817 | 0.21392 |
| C17  | 0.98485 | -0.888   | 0.1796  |
| C18  | 1.00937 | -0.91718 | 0.23309 |
| C19  | 1.03714 | -0.90585 | 0.3251  |
| C20  | 1.04187 | -0.86596 | 0.35756 |
| C21  | 1.00418 | -0.95969 | 0.1975  |
| C22  | 0.96447 | -0.97606 | 0.19555 |
| C23  | 1.03614 | -0.98356 | 0.1453  |
| C24  | 0.89794 | -0.0228  | 0.24436 |
| C25  | 0.92481 | -0.03362 | 0.15003 |
| C26  | 1.09113 | -0.00601 | 0.33189 |
| C27  | 1.05546 | -0.02638 | 0.31562 |
| H28  | 1.22326 | -0.43752 | 0.35946 |
| H29  | 1.15417 | -0.43623 | 0.40958 |
| H30  | 1.14906 | -0.56375 | 0.36879 |
| H31  | 1.21886 | -0.56421 | 0.31711 |
| H32  | 1.12728 | -0.57066 | 0.59252 |

|     |         |          |         |
|-----|---------|----------|---------|
| H33 | 1.07217 | -0.62311 | 0.59763 |
| H34 | 1.04714 | -0.78739 | 0.40279 |
| H35 | 0.96967 | -0.82635 | 0.17074 |
| H36 | 0.96234 | -0.89606 | 0.11173 |
| H37 | 1.05468 | -0.92784 | 0.37398 |
| H38 | 1.06377 | -0.85801 | 0.42803 |
| H39 | 0.86983 | -0.03806 | 0.25316 |
| H40 | 0.9175  | -0.05779 | 0.08707 |
| H41 | 1.10988 | -0.01199 | 0.41224 |
| H42 | 1.04716 | -0.04854 | 0.38492 |

---

218

219
